# Supplementary material
Source: Springer Nature journal article supplement (https://www.springermedizin.de/resource/supplementary/12936_2012_2056_MOESM11_ESM.PDF/9542450)
Supplement: MOESM11 [file 9542450]

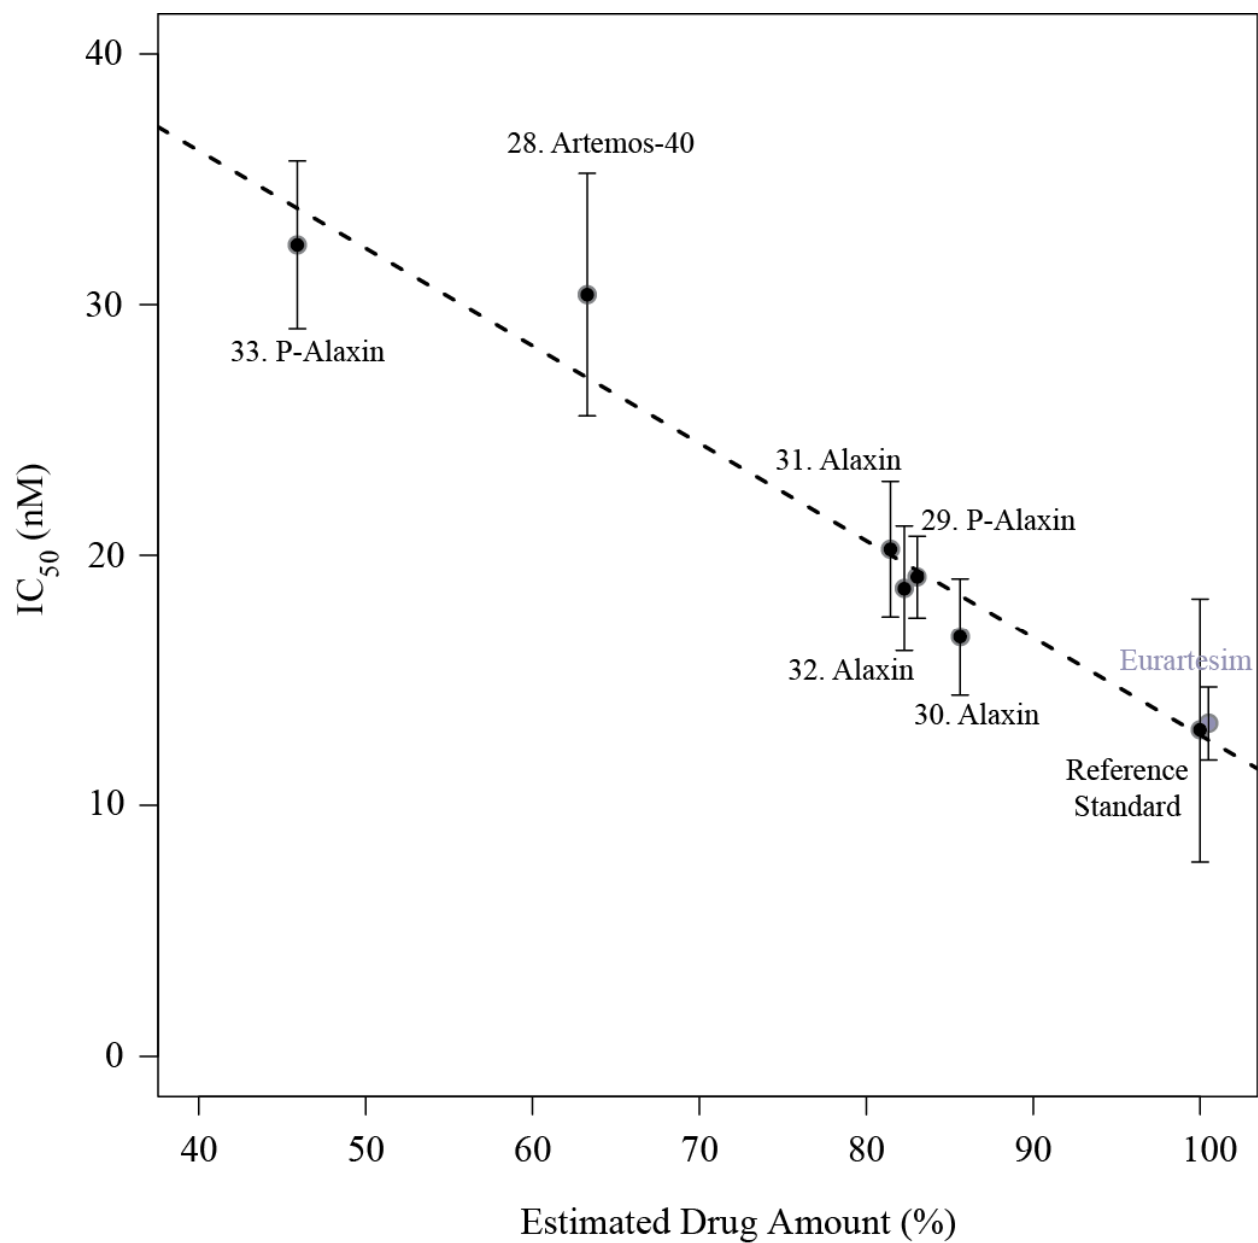

**Additional File 11: IC<sub>50</sub> vs. Observed drug Quantity**

IC<sub>50</sub> values and drug quantities reported here are prior to a two-fold dilution. While the dilution series indicated that these drugs are solubility limited, this assay shows a high correlation between NMR-observed concentrations and biological activity.
